# Supplementary material for: Computational insight into the peptide-based inhibition of α-cobratoxin
Source: Royal Society of Chemistry journal article supplement (doi:10.1039/d4cp03408b), 2024-01-01
Supplement: d4cp03408b1.pdf [file d4cp03408b1.pdf]

Supplementary Information for  
**Computational Insight into the Peptide-Based  
Inhibition of  $\alpha$ -Cobratoxin**

Aritra Mitra<sup>a</sup>, Pandijothi Viswas<sup>a</sup> and Sandip Paul<sup>a,\*</sup>

<sup>a</sup>Department of Chemistry, Indian Institute of Technology Guwahati, Guwahati 781039, Assam, India.

\*S.P is the corresponding author. Email: sandipp@iitg.ac.in

**Table S1:** Structural features and free energy differences between the different conformers of the  $\alpha$ -CbtX dimer in the absence of **Inh**

|                                | <b>Conf-1</b> | <b>Conf-2</b> | <b>Conf-3</b> | <b>Conf-4</b> | <b>Conf-5</b> |
|--------------------------------|---------------|---------------|---------------|---------------|---------------|
| $R_g$ (Å)                      | 15.06±0.12    | 15.88±0.18    | 16.42±0.18    | 18.67±0.20    | 16.36±0.14    |
| Contact Area (Å <sup>2</sup> ) | 694.65±68.07  | 573.42±65.36  | 462.65±66.70  | 488.17±65.80  | 610.05±45.54  |
| $d_{\text{COM}}$ (Å)           | 17.60±0.39    | 20.34±0.53    | 22.31±0.57    | 26.77±0.58    | 21.55±0.40    |
| $d_{\text{Loop-II}}$ (Å)       | 22.26±1.50    | 25.96±2.20    | 30.91±2.68    | 25.99±1.32    | 36.56±1.58    |
| Angle ( $\theta$ )             | 14.53±7.80    | 80.38±40.15   | 29.45±11.64   | 40.38±6.30    | 106.32±11.18  |
| $\Delta G$ (kcal/mol)          | 0             | 0.45          | 0.52          | 0.59          | 0.68          |

**Table S2:** Structural features and free energy differences between the different conformers of the  $\alpha$ -CbtX dimer in the presence of **Inh**

|                                | <b>Conf-1</b> | <b>Conf-2</b> | <b>Conf-3</b> | <b>Conf-4</b> | <b>Conf-5</b> |
|--------------------------------|---------------|---------------|---------------|---------------|---------------|
| $R_g$ (Å)                      | 19.05±0.16    | 16.31±0.18    | 19.28±0.27    | 18.93±0.42    | 16.06±0.18    |
| Contact Area (Å <sup>2</sup> ) | 544.60±80.60  | 699.42±73.17  | 354.78±45.92  | 282.25±28.72  | 773.69±108.32 |
| $d_{\text{COM}}$ (Å)           | 28.37±0.48    | 18.18±0.54    | 29.41±0.59    | 28.54±1.03    | 18.11±0.57    |
| $d_{\text{Loop-II}}$ (Å)       | 11.23±0.88    | 25.43±0.72    | 15.98±1.09    | 29.23±0.78    | 25.81±1.01    |
| Angle ( $\theta$ )             | 166.84±4.93   | 169.65±3.87   | 154.47±6.12   | 66.55±6.63    | 157.09±4.01   |
| $\Delta G$ (kcal/mol)          | 0             | 0.52          | 0.61          | 0.70          | 0.83          |

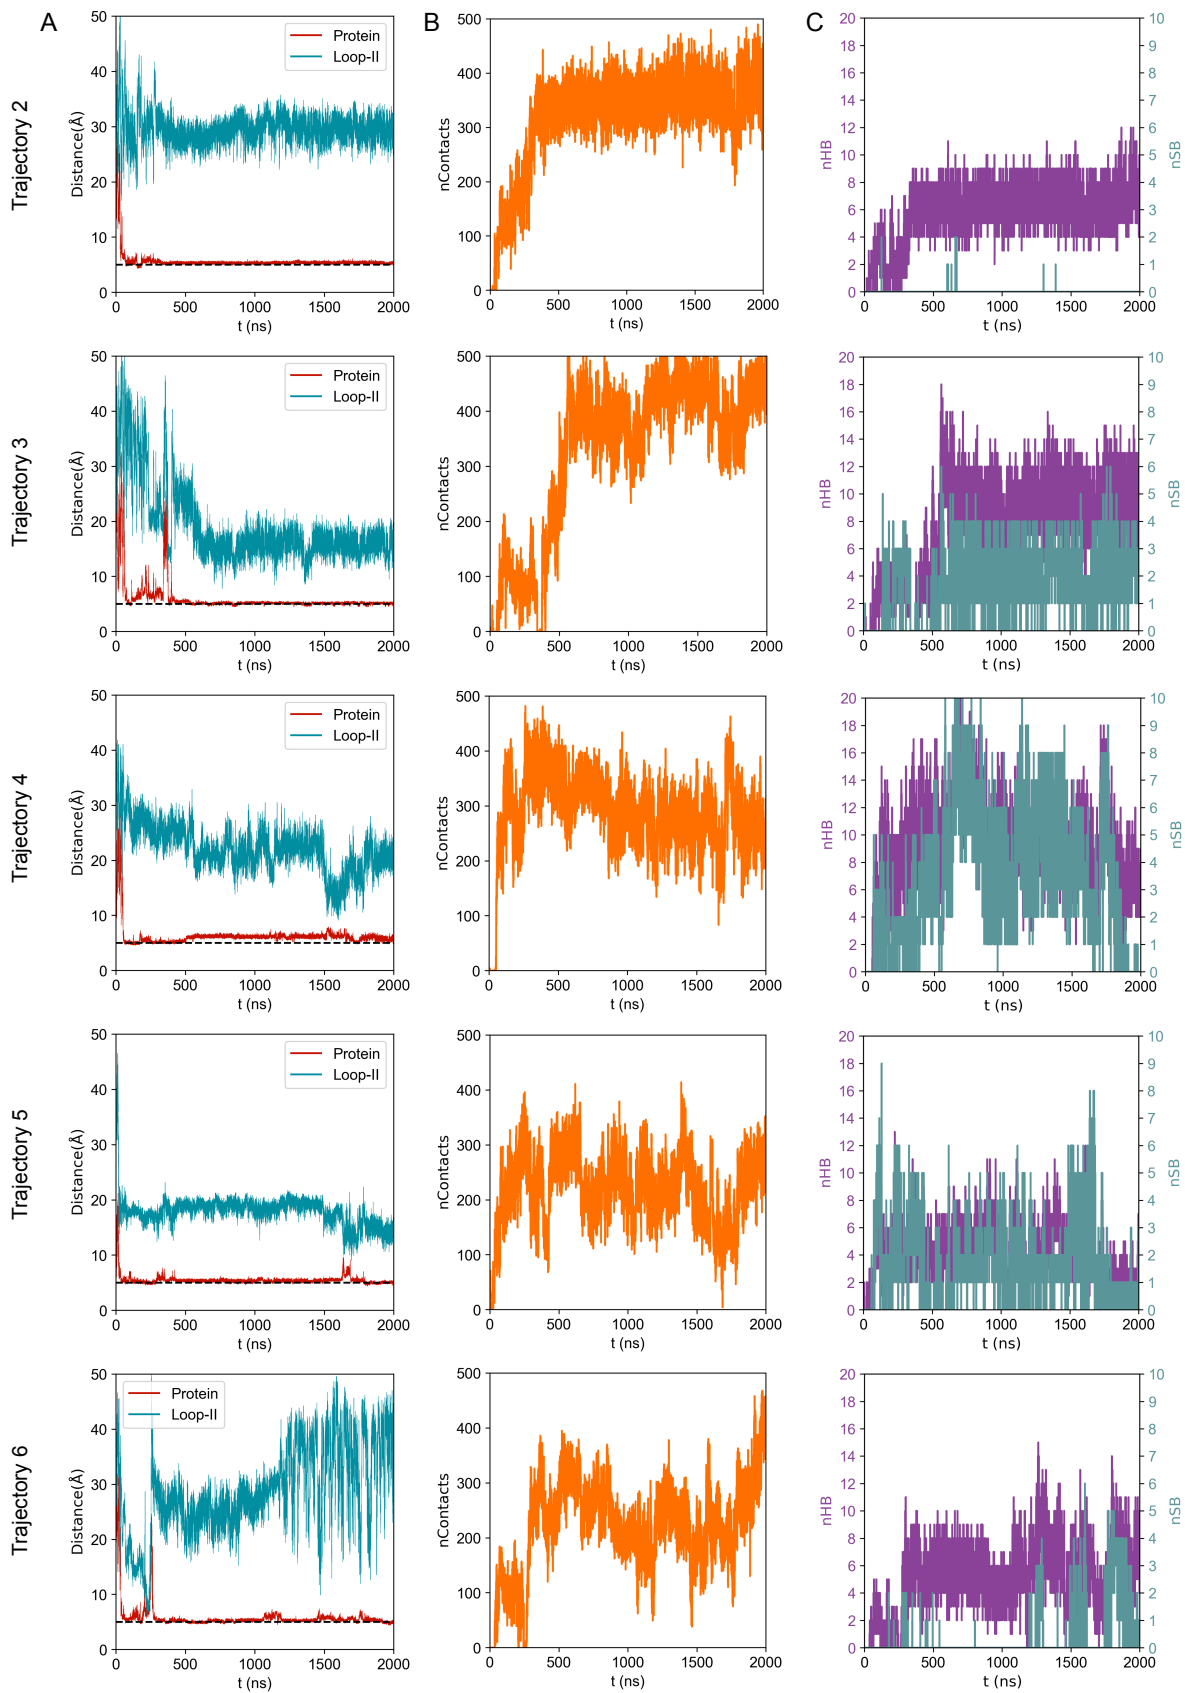

**Figure S1:  $\alpha$ -CbtX association dynamics in Trajectory-2 to 6:** (A) Distance between non-specific residues on the  $\alpha$ -CbtX surface (red) and the finger region of Loop-II (residues 27 to 36) of the two chains (blue). (B) Number of heavy atom contacts between the two chains. (C) Number of inter-chain hydrogen bonds and salt bridges as a function of time.

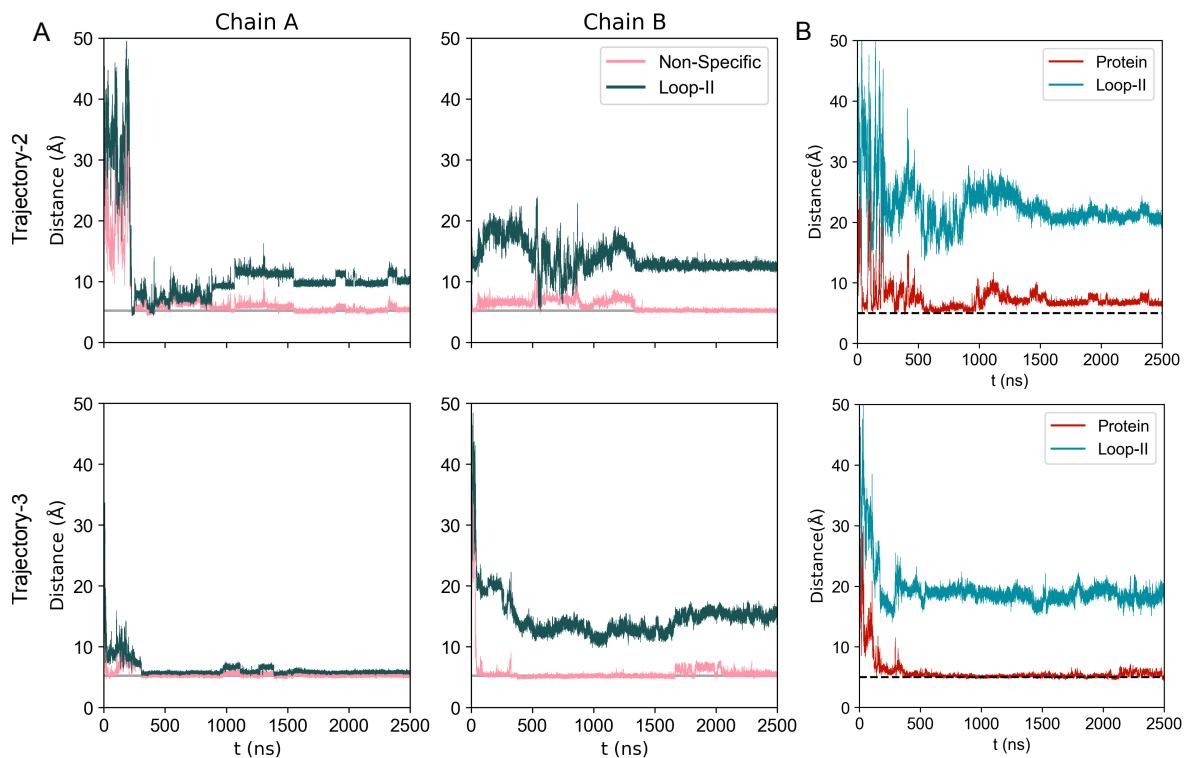

**Figure S2: Binding of Inh to  $\alpha$ -CbtX chains in Trajectory-2 and 3:** (A) Time evolution of the **Inh** distance to non-specific residues (pink) and Loop-II residues (green) in chain A and chain B. (B) Distance between the  $\alpha$ -CbtX chains (red) and the Loop-II residues of the two chains (blue).

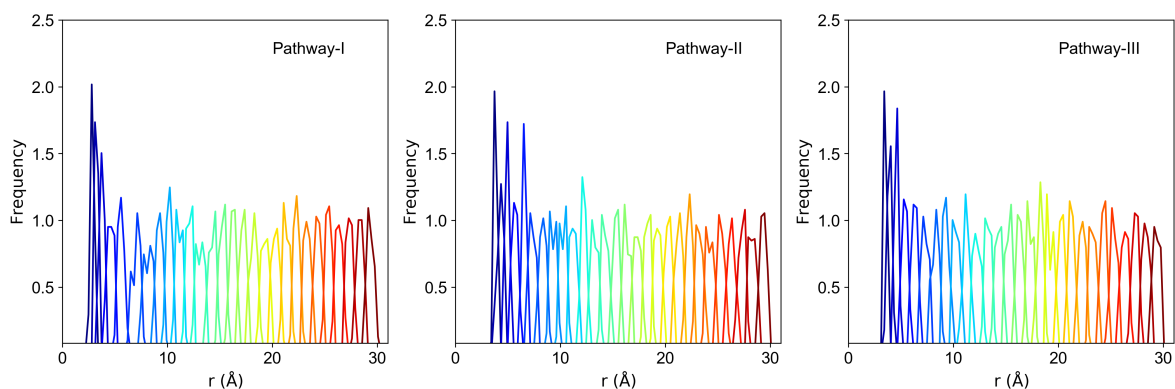

**Figure S3:** Histograms representing overlap between the consecutive windows in the reaction coordinate of the three proposed pathways of **Inh** unbinding (Pathway-I, Pathway-II and Pathway-III) from the equilibrated crystal structure.
